# Supplementary material
Source: Springer Nature journal article supplement (https://www.springermedizin.de/resource/supplementary/12967_2013_1688_MOESM1_ESM.pdf/9574660)

**% ADCC**

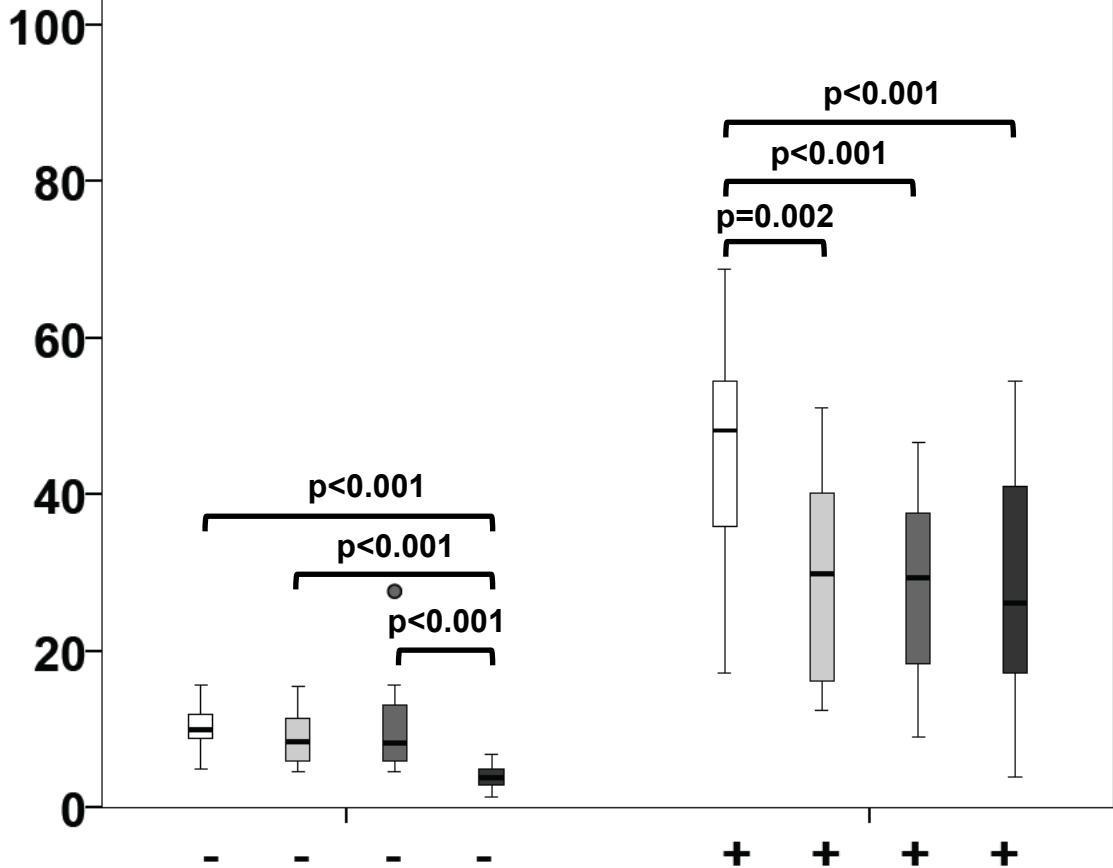

Supplement: MOESM1 [file 9574660]
